# Supplementary material for: Erratum to: Algorithm of OMA for large-scale orthology inference
Source: Springer Nature journal article supplement (doi:10.1186/1471-2105-10-220), 2009-07-16

**A**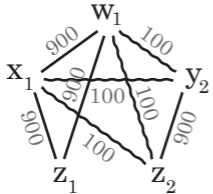**B**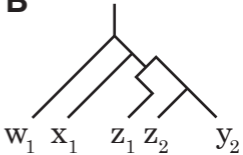

Supplement: 12859_2009_2950_MOESM1_ESM.pdf [file 12859_2009_2950_MOESM1_ESM.pdf]
